# Supplementary material
Source: HighWire-hosted journal article supplement (https://bmjopen.bmj.com/content/12/8/e060682)
Supplement: inline-supplementary-material-1 [file inline-supplementary-material-1.pdf]

**Appendix 1: Format VBHC projects (multiple 2019)**

|                                                                                                                                                                                                       |                                                                                                                                                                  |
|-------------------------------------------------------------------------------------------------------------------------------------------------------------------------------------------------------|------------------------------------------------------------------------------------------------------------------------------------------------------------------|
| <b>Format VBHC project</b><br><i>[title of project]</i>                                                                                                                                               |                                                                                                                                                                  |
| <b>ABSTRACT (Max. 150 words)</b>                                                                                                                                                                      |                                                                                                                                                                  |
| <b>A) What does this project contribute to the improvement of the quality of care at your department or organisation?</b>                                                                             |                                                                                                                                                                  |
| <b>B) How are the general competencies (for example communicator, collaborator, leader, health advocate and professional) trained and evaluated by conducting and implementing this VBHC project?</b> |                                                                                                                                                                  |
| <b>C) How will you secure this VBHC project within your organisation or at your department?</b>                                                                                                       |                                                                                                                                                                  |
| <b>1) Medical specialty:</b>                                                                                                                                                                          |                                                                                                                                                                  |
| <b>2) Issue:</b>                                                                                                                                                                                      | <i>[describe with a max. of 150 words what the problem or issue is you would like to change with this project]</i>                                               |
| <b>3) Goal of the project:</b>                                                                                                                                                                        | <i>[describe what your main goal is]</i>                                                                                                                         |
| <b>4) Plan of action:</b>                                                                                                                                                                             | <i>[describe your plan of action stepwise, max. 200 words. Describe the procedure and your plan of implementation. Explain both analysis and plan of action]</i> |
| <b>5) Aimed results:</b>                                                                                                                                                                              | <i>[describe, max. 150 words, your aimed results of this VBHC project, in terms of costs and effects]</i>                                                        |
| <b>6) Achieved results:</b>                                                                                                                                                                           | <i>[describe, max. 150 words, your results so far, in terms of costs and effects]</i>                                                                            |
| <b>7) Evaluation:</b>                                                                                                                                                                                 | <i>[describe, max. 150 words, how you will evaluate the costs and effects of your VBHC project, in the long-term]</i>                                            |
| <b>8) Consolidate:</b>                                                                                                                                                                                | <i>[describe, max. 150 words, how you will institutionalize this project within the current structure of the organisation or department]</i>                     |
| <b>9) Generalizability:</b>                                                                                                                                                                           | <i>[describe if your results might be applicable at other departments, organisations or regions]</i>                                                             |
| <b>10) Role resident:</b>                                                                                                                                                                             | <i>[describe your role in this VBHC project]</i>                                                                                                                 |
| <b>11) Learning effects:</b>                                                                                                                                                                          | <i>[describe what you learned by executing this project, how you learned this and how evaluated what you have learned]</i>                                       |
| <b>12) Mentor:</b>                                                                                                                                                                                    | <i>[describe the role of the mentor / supervisor regarding the execution of the VBHC project]</i>                                                                |

☐ I agree this information will be published at the OORZON (Southeast region of Netherlands) website.

**Appendix 2:** Topic list for semi-structured interview

The topic list was constructed by two experienced researchers in this field, minor changes were made after a pilot interview.

|                           |                                                                                                                                                                  |
|---------------------------|------------------------------------------------------------------------------------------------------------------------------------------------------------------|
| <b>VBHC-<br/>Projects</b> | <b>1) General information</b><br>- Definition of VBHC & position in PGME<br>- Goal of own VBHC project<br>- Orientation (education, process, care delivery, ...) |
|                           | <b>2) Implementation</b><br>- Enhancing factors<br>- Hindering factors                                                                                           |
|                           | <b>3) Learning goals and learning curves</b><br>- initial goal<br>- achieved goal                                                                                |
|                           | <b>4) Self-perceived competency training</b><br>- components trained & developed                                                                                 |
|                           | <b>5) Self-perceived effect on influencing medical care</b><br>- patient outcomes and experiences<br>- costs (for example in monetary terms, efficiency, others) |
|                           | <b>6) Embedding within organisation</b><br>- reasons<br>- enhancing or hindering factors                                                                         |

**Appendix 3:** Basic characteristics and focus of projects of the residents interviewed

|     | Specialty      | Impl.* | Primary focus       | Res.** | Explanation of exact focus                                                                                            |
|-----|----------------|--------|---------------------|--------|-----------------------------------------------------------------------------------------------------------------------|
| R1  | Neurosurgery   | Yes    | Education           | No     | Development of a training session for other residents on registration and finances in their department                |
| R2  | Anesthesiology | Partly | Care and efficiency | No     | ICT application to register any language barriers and provide helpful tools to overcome this language barrier         |
| R3  | Anesthesiology | Partly | Care and efficiency | No     | ICT application to register any language barriers and provide helpful tools to overcome this language barrier         |
| R4  | Rehabilitation | Yes    | Care and efficiency | No     | Improving the leading time of patient letters                                                                         |
| R5  | Neurology      | Yes    | Care and efficiency | No     | Implementation of digital patient letters to improve lead time                                                        |
| R6  | Pediatrics     | Yes    | Care and efficiency | No     | Give residents a day at another speciality to learn from each other and see possibilities to make work more efficient |
| R7  | Rehabilitation | Yes    | Care                | Yes    | Stop standard laboratory testing on admittance, only perform test when necessary                                      |
| R8  | Psychiatry     | Yes    | Care and efficiency | Yes    | Send a standard SMS reminder before outpatient consults to reduce the number of no-shows                              |
| R9  | Gynaecology    | Yes    | Care and efficiency | Yes    | Direct removal of a catheter after a laparoscopic hysterectomy                                                        |
| R10 | Pediatrics     | No     | Care and efficiency | No     | Implementing a new structure for duty schedules to bring more continuity on the ward                                  |
| R11 | Neurology      | No     | Care and efficiency | No     | ICT application to show when a patient had completed in hospital treatment and is waiting for a bed elsewhere         |

\* Implemented at time of the interview.

\*\* VBHC project was part of a research project or PhD trajectory

**Appendix 4: Tips for residents' performing a VBHC project within a modified model of change**

---

Examine the VBHC problem thoroughly

- *Complete assessment of the current situation from multiple perspectives (patient, doctor, organisation, etc)*
- *Take the culture of the organisation into account*

---

Establish a sense of urgency and/or relevance

---

Identify potential problems that could stand in the way of your change

- *Identify and involve all stakeholders*

---

Form a powerful coalition with enough power to lead the change

Different key roles:

- *Sponsor and/or advocate (can be a supervisor or mentor for instance)*
- *Implementer (often resident)*
- *Change agent (often resident)*

---

Create a vision and develop strategies for achieving that vision

- *keep it small and keep it simple, within your scope of power*

---

Communicate your vision

---

Plan for short-term wins

- *make sure you can show what is improved*

---

Consolidating improvement and still produces more change

- *implementation is more than changing a protocol. All employees involved need to work in the new way.*

---

Institutionalizing your change so it is incorporated in the new culture

- *make sure you can show what is improved to support the sense of urgency to stick to the new way of working*
  - *secure the new way of working in ways that are not solely depending on your presence*
-
